# Supplementary material for: A Web-Based and In-Person Risk Reframing Intervention to Influence Mothers’ Tolerance for, and Parenting Practices Associated With, Children’s Outdoor Risky Play: Randomized Controlled Trial
Source: PubMed Central journal article supplement (PMC8114163; doi:10.2196/24861), 2021-04-27
Supplement: jmir_v23i4e24861_app4.pdf [file jmir_v23i4e24861_app4.pdf]

## **Statistical differences for other sociodemographic characteristics**

### **1-week after the intervention**

Age:  $P=.71$ ; ethnicity:  $P=.92$ ; marital status:  $P=.26$ ; education:  $P=.09$ ; employment:  $P=.21$ ; home dwelling:  $P=.82$ ; income:  $P=.24$ ; exposure to risky play information:  $P=.25$ ; child age:  $P=.28$ .; child sex:  $P=.68$ ; weekday outdoor time:  $P=.34$ ; weekend outdoor time:  $P=.93$ .

### **3 months after the intervention**

Age:  $P=.84$ ; ethnicity:  $P=.89$ ; marital status:  $P=.38$ ; education:  $P=.09$ ; employment:  $P=.41$ ; home dwelling:  $P=.90$ ; income:  $P=.26$ ; exposure to risky play information:  $P=.14$ ; child age:  $P=.28$ ; child sex:  $P=.59$ ; weekday outdoor time:  $P=.41$ ; weekend outdoor time:  $P=.88$ .

When **comparing those who completed the intervention with those who did not**, the following were obtained: age:  $P=.11$ ; ethnicity:  $P=.08$ ; marital status:  $P=.98$ ; education:  $P=.34$ ; home dwelling:  $P=.33$ ; income:  $P=.65$ ; exposure to risky play information:  $P=.40$ ; child age:  $P=.09$ ; child sex:  $P=.97$ ; child's disability/chronic condition:  $P=.59$ ; weekday outdoor time:  $P=.79$ ; weekend outdoor time:  $P=.25$
